# Supplementary material for: Enhancing Water Status and Nutrient Uptake in Drought-Stressed Lettuce Plants (Lactuca sativa L.) via Inoculation with Different Bacillus spp. Isolated from the Atacama Desert
Source: MDPI journal article supplement (doi:10.3390/plants13020158), 2024-01-06
Supplement: s1 [file s1]

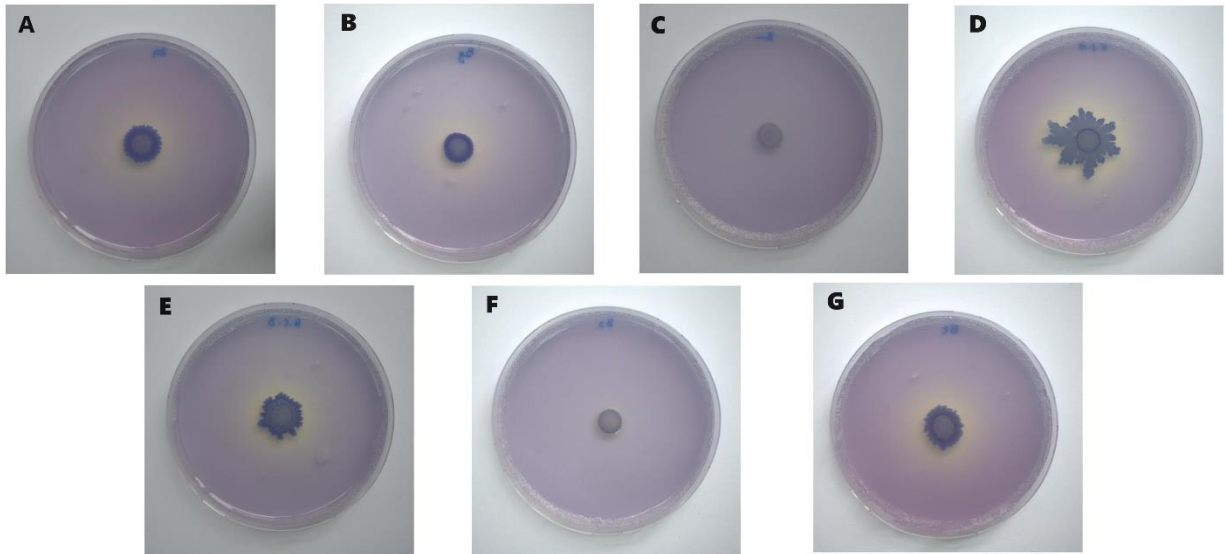

**Figure S1.** Phosphate solubilization produced by the *Bacillus spp.* strains isolated from the Atacama Desert. (A) *Bacillus atrophaeus* ATNJC12015, (B) *Bacillus ginsengihumi* ATNJC22015, (C) *Bacillus megaterium* ATMLC22021, (D) *Bacillus subtilis* ATMLC92021, (E) *Bacillus subtilis* ATMLC152021, (F) *Bacillus frigoritolerans* ATMLC42021, and (G) *Bacillus tequilensis* ATMLC102021.

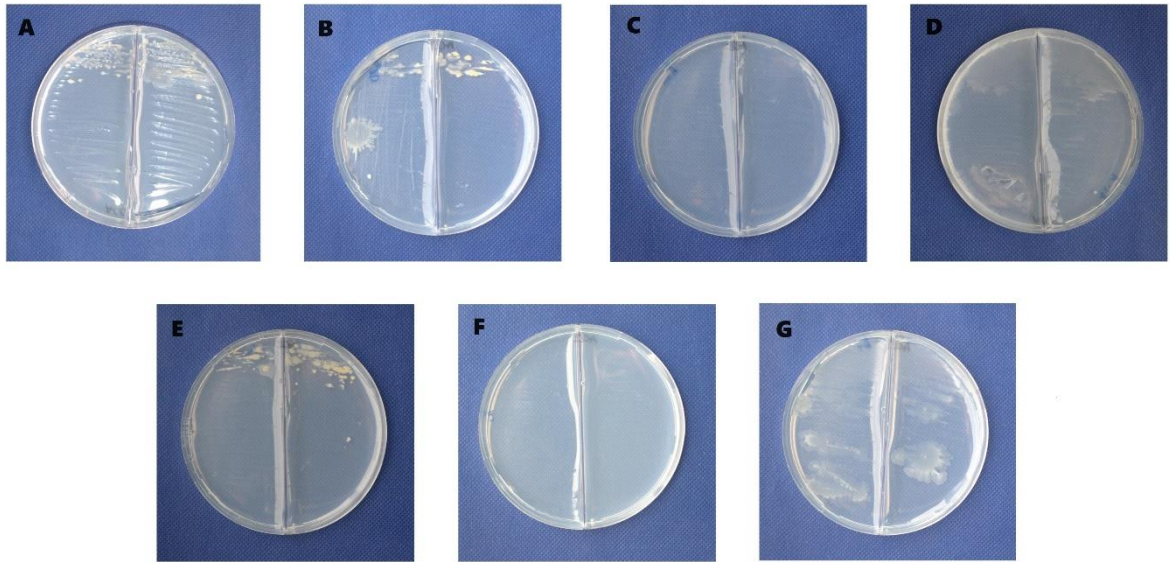

**Figure S2.** 1-aminocyclopropane-1-carboxylic acid (ACC) deaminase activity produced by the *Bacillus spp.* strains isolated from the Atacama Desert. (A) *Bacillus atrophaeus* ATNJC12015, (B) *Bacillus ginsengihumi* ATNJC22015, (C) *Bacillus megaterium* ATMLC22021, (D) *Bacillus subtilis* ATMLC92021, (E) *Bacillus subtilis* ATMLC152021, (F) *Bacillus frigoritolerans* ATMLC42021, and (G) *Bacillus tequilensis* ATMLC102021.

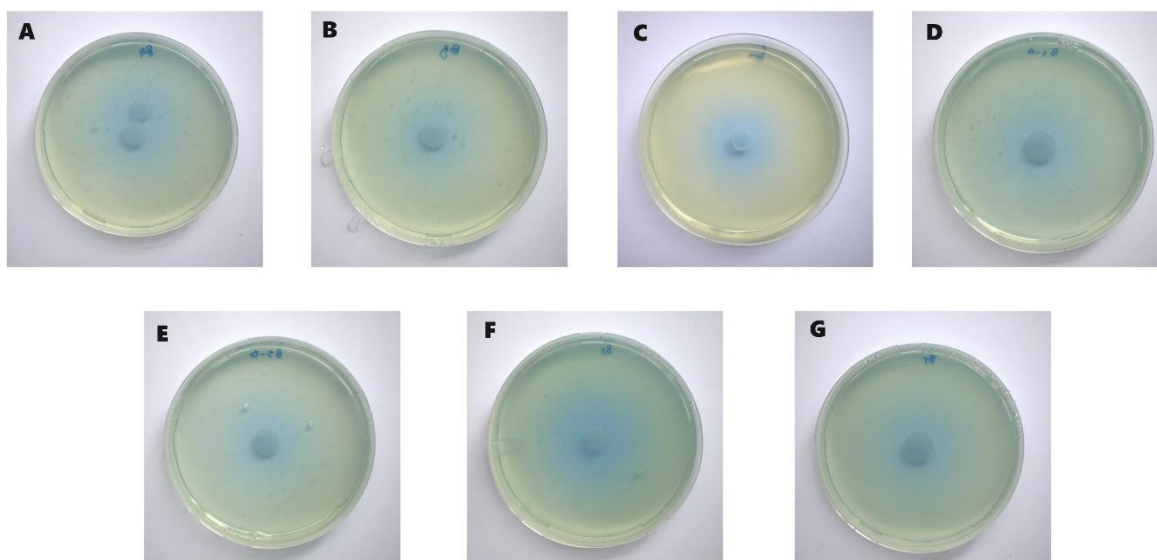

**Figure S3.** N<sub>2</sub> fixation activity of the *Bacillus* spp. strains isolated from the Atacama Desert. (A) *Bacillus atrophaeus* ATNJC12015, (B) *Bacillus ginsengihumi* ATNJC22015, (C) *Bacillus megaterium* ATMLC22021, (D) *Bacillus subtilis* ATMLC92021, (E) *Bacillus subtilis* ATMLC152021, (F) *Bacillus frigoritolerans* ATMLC42021, and (G) *Bacillus tequilensis* ATMLC102021.
